# Supplementary material for: The prognostic value of age in non-metastatic gastric cancer after gastrectomy: a retrospective study in the U.S. and China
Source: PubMed Central journal article supplement — J Cancer. 2018 Mar 8;9(7):1188–99. doi: 10.7150/jca.22085 (PMC5907667; doi:10.7150/jca.22085), 2018-03-08
Supplement: jcav09p1188s1.pdf [file jcav09p1188s1.pdf]

**Table S1. Characteristics of patients with gastric cancer by age, young versus elderly. SEER 2004-2012 (n=16856)<sup>a</sup>**

| Characteristics                   | Total       | <50          | ≥50           | P value <sup>b</sup> |
|-----------------------------------|-------------|--------------|---------------|----------------------|
|                                   | 16856 (100) | 2240 (13.29) | 14616 (86.71) |                      |
| <b>Median Follow-up</b>           |             |              |               |                      |
| Months (IQR)                      |             | 11 (4-30)    | 11 (3-31)     |                      |
| <b>Age (IQR)</b>                  |             | 43 (38-47)   | 72 (63-80)    |                      |
| <b>Sex</b>                        |             |              |               | <0.001               |
| male                              | 9432 (100)  | 1146 (12.15) | 8286 (87.85)  |                      |
| female                            | 7424 (100)  | 1094 (14.74) | 6330 (85.26)  |                      |
| <b>Race</b>                       |             |              |               | 0.001                |
| white                             | 10262 (100) | 1334 (13)    | 8928 (87)     |                      |
| black                             | 2800 (100)  | 423 (15.11)  | 2377 (84.89)  |                      |
| American Indian/Alaska Native     | 159 (100)   | 32 (20.13)   | 127 (79.87)   |                      |
| Asian or Pacific Islander         | 3579 (100)  | 444 (12.41)  | 3135 (87.59)  |                      |
| Unknown                           | 56 (100)    | 7 (12.5)     | 49 (87.5)     |                      |
| <b>Marital status</b>             |             |              |               | <0.001               |
| Married                           | 9852 (100)  | 1410 (14.31) | 8442 (85.69)  |                      |
| Single (never married)            | 2428 (100)  | 636 (26.19)  | 1792 (73.81)  |                      |
| Divorced/Separated                | 1530 (100)  | 177 (11.57)  | 1353 (88.43)  |                      |
| Widowed                           | 3046 (100)  | 17 (0.56)    | 3029 (99.44)  |                      |
| <b>Histological type</b>          |             |              |               | <0.001               |
| Adenocarcinoma, NOS               | 8254 (100)  | 770 (9.33)   | 7484 (90.67)  |                      |
| Adenocarcinoma, intestinal type   | 2424 (100)  | 110 (4.54)   | 2314 (95.46)  |                      |
| Carcinoma, diffuse type           | 1083 (100)  | 236 (21.79)  | 847 (78.21)   |                      |
| Tubular adenocarcinoma            | 166 (100)   | 8 (4.82)     | 158 (95.18)   |                      |
| Papillary adenocarcinoma, NOS     | 41 (100)    | 5 (12.2)     | 36 (87.8)     |                      |
| Mucinous adenocarcinoma           | 308 (100)   | 31 (10.06)   | 277 (89.94)   |                      |
| Signet ring cell carcinoma        | 4580 (100)  | 1080 (23.58) | 3500 (76.42)  |                      |
| <b>Site</b>                       |             |              |               | <0.001               |
| Fundus of stomach                 | 854 (100)   | 98 (11.48)   | 756 (88.52)   |                      |
| Body of stomach                   | 2109 (100)  | 257 (12.19)  | 1852 (87.81)  |                      |
| Gastric antrum                    | 5426 (100)  | 658 (12.13)  | 4768 (87.87)  |                      |
| Pylorus                           | 838 (100)   | 102 (12.17)  | 736 (87.83)   |                      |
| Lesser curvature of stomach, NOS  | 2201 (100)  | 269 (12.22)  | 1932 (87.78)  |                      |
| Greater curvature of stomach, NOS | 987 (100)   | 144 (14.59)  | 843 (85.41)   |                      |
| Overlapping lesion of stomach     | 1884 (100)  | 315 (16.72)  | 1569 (83.28)  |                      |
| Stomach, NOS                      | 2557 (100)  | 397 (15.53)  | 2160 (84.47)  |                      |
| <b>Stage<sup>c</sup></b>          |             |              |               | <0.001               |
| I                                 | 4453 (100)  | 342 (7.68)   | 4111 (92.32)  |                      |
| II                                | 3708 (100)  | 432 (11.65)  | 3276 (88.35)  |                      |
| III                               | 4054 (100)  | 563 (13.89)  | 3491 (86.11)  |                      |
| IV                                | 4641 (100)  | 903 (19.46)  | 3738 (80.54)  |                      |

|                                            |               |              |               |        |
|--------------------------------------------|---------------|--------------|---------------|--------|
| <b>Depth of invasion</b>                   |               |              |               |        |
| T1                                         | 4859 (28.83)  | 472 (21.07)  | 4387 (30.02)  |        |
| T2                                         | 1741 (10.33)  | 203 (9.06)   | 1538 (10.52)  |        |
| T3                                         | 7382 (43.79)  | 1042 (46.52) | 6340 (43.38)  |        |
| T4                                         | 2874 (17.05)  | 523 (23.35)  | 2351 (16.09)  |        |
| <b>Lymph node involvement</b>              |               |              |               |        |
| N0                                         | 7912 (46.94)  | 894 (39.91)  | 7018 (48.02)  |        |
| N1                                         | 1953 (11.59)  | 240 (10.71)  | 1713 (11.72)  |        |
| N2                                         | 3930 (23.32)  | 602 (26.88)  | 3328 (22.77)  |        |
| N3                                         | 3061 (18.16)  | 504 (22.5)   | 2557 (17.49)  |        |
| <b>Distant metastasis</b>                  |               |              |               |        |
| M0                                         | 12216 (72.47) | 1338 (59.73) | 10878 (74.43) |        |
| M1                                         | 4640 (27.53)  | 902 (40.27)  | 3738 (25.57)  |        |
| <b>Grade</b>                               |               |              |               |        |
| Grade I                                    | 597 (100)     | 34 (5.7)     | 563 (94.3)    | <0.001 |
| Grade II                                   | 3685 (100)    | 181 (4.91)   | 3504 (95.09)  |        |
| Grade III                                  | 10500 (100)   | 1700 (16.19) | 8800 (83.81)  |        |
| Grade IV                                   | 339 (100)     | 55 (16.22)   | 284 (83.78)   |        |
| cell type not determined                   | 1735 (100)    | 270 (15.56)  | 1465 (84.44)  |        |
| <b>Surgery</b>                             |               |              |               |        |
| No surgery                                 | 5405 (100)    | 792 (14.65)  | 4613 (85.35)  | <0.001 |
| Non-Total or Non-near-total<br>gastrectomy | 8935 (100)    | 1015 (11.36) | 7920 (88.64)  |        |
| Total or near total gastrectomy            | 2516 (100)    | 433 (17.21)  | 2083 (82.79)  |        |
| <b>Radiotherapy</b>                        |               |              |               |        |
| No radiotherapy                            | 12746 (100)   | 1503 (11.79) | 11243 (88.21) | <0.001 |
| Radiotherapy                               | 3858 (100)    | 701 (18.17)  | 3157 (81.83)  |        |
| Radiotherapy unknown                       | 252 (100)     | 36 (14.29)   | 216 (85.71)   |        |

Abbreviation: NOS= no other specific; SEER=Surveillance, Epidemiology and End Results;  
IQR=interquartile range

<sup>a</sup>Data are presented as No.(percentage) of patients.

<sup>b</sup>P value of the Chi-square test or Wilcoxon-Mann-Whitney test comparing young and elderly groups

<sup>c</sup>Being restaged according to the criteria of AJCC Cancer Staging Manual (7th edition, 2010)

**Table S2. Univariate and multivariate survival analysis for age on gastric cancer-specific survival (CSS) by surgery. SEER 2004-2012 (n=12216)**

| Surgery                               | 3-year CSS | Univariate analysis |         | Multivariate analysis |           |         |
|---------------------------------------|------------|---------------------|---------|-----------------------|-----------|---------|
|                                       |            | Log rank $\chi^2$   | P value | HR                    | 95%CI     | P value |
| <b>No surgery (n=2332)</b>            |            |                     |         |                       |           |         |
| <b>Age</b>                            |            | 3.1                 | 0.0781  |                       |           |         |
| <50                                   | 20.49%     |                     |         |                       |           |         |
| $\geq$ 50                             | 17.88%     |                     |         |                       |           |         |
| <b>Non-Total gastrectomy (n=7780)</b> |            |                     |         |                       |           |         |
| <b>Age</b>                            |            | 2.12                | 0.1457  |                       |           |         |
| <50                                   | 64.95%     |                     |         |                       |           |         |
| $\geq$ 50                             | 62.01%     |                     |         |                       |           |         |
| <b>Total gastrectomy (n=2104)</b>     |            |                     |         |                       |           |         |
| <b>Age</b>                            |            | 5.33                | 0.021   |                       |           |         |
| <50                                   | 55.93%     |                     |         | Reference             |           |         |
| $\geq$ 50                             | 48.73%     |                     |         | 1.34                  | 1.11-1.62 | 0.003   |

Abbreviation: SEER=Surveillance, Epidemiology and End Results;

**Table S3. Univariate and multivariate survival analysis for age on gastric cancer-specific survival (CSS) by surgery, in 1:1 matching. SEER 2004-2012 (n=2676)**

| Variable                             | 3-year CSS | Univariate Analysis |         | Multivariate Analysis |           |         |
|--------------------------------------|------------|---------------------|---------|-----------------------|-----------|---------|
|                                      |            | Log rank $\chi^2$   | P Value | HR                    | 95%CI     | P Value |
| <b>Age</b>                           |            | 17.65               | <0.001  |                       |           |         |
| <50                                  | 56.60%     |                     |         | Reference             |           |         |
| ≥50                                  | 48.76%     |                     |         | 1.39                  | 1.23-1.57 | <0.001  |
| <b>Primary Site</b>                  |            | 87.91               | <0.001  |                       |           |         |
| Fundus of stomach                    | 41.99%     |                     |         | Reference             |           |         |
| Body of stomach                      | 55.51%     |                     |         | 0.85                  | 0.63-1.15 | 0.288   |
| Gastric antrum                       | 57.36%     |                     |         | 0.85                  | 0.65-1.12 | 0.254   |
| Pylorus                              | 56.94%     |                     |         | 1.04                  | 0.74-1.46 | 0.825   |
| Lesser curvature of stomach, NOS     | 60.96%     |                     |         | 0.68                  | 0.51-0.92 | 0.012   |
| Greater curvature of stomach, NOS    | 58.65%     |                     |         | 0.9                   | 0.64-1.27 | 0.536   |
| Overlapping lesion of stomach        | 33.43%     |                     |         | 1.18                  | 0.88-1.58 | 0.259   |
| Stomach, NOS                         | 43.65%     |                     |         | 1.09                  | 0.82-1.46 | 0.555   |
| <b>Sex</b>                           |            | 1.34                | 0.2472  |                       |           |         |
| Male                                 | 53.22%     |                     |         |                       |           |         |
| Female                               | 52.00%     |                     |         |                       |           |         |
| <b>Race</b>                          |            | 37.06               | <0.001  |                       |           |         |
| white                                | 49.14%     |                     |         | Reference             |           |         |
| black                                | 50.49%     |                     |         | 0.97                  | 0.84-1.12 | 0.682   |
| American Indian/Alaska Native        | 50.37%     |                     |         | 1                     | 0.59-1.70 | 0.991   |
| Asian or Pacific Islander            | 63.67%     |                     |         | 0.77                  | 0.66-0.90 | 0.001   |
| Unknown                              | 85.71%     |                     |         | 0.29                  | 0.04-2.05 | 0.213   |
| <b>Marital status</b>                |            | 21.56               | <0.001  |                       |           |         |
| Married                              | 55.35%     |                     |         | Reference             |           |         |
| Single (never married)               | 48.61%     |                     |         | 1.23                  | 1.05-1.43 | 0.010   |
| Divorced/Separated                   | 49.96%     |                     |         | 1.14                  | 0.94-1.38 | 0.187   |
| Widowed                              | 45.19%     |                     |         | 1.26                  | 1.03-1.53 | 0.025   |
| <b>Grade</b>                         |            | 40.6                | <0.001  |                       |           |         |
| Grade I (well differentiated)        | 87.95%     |                     |         | Reference             |           |         |
| Grade II (moderately differentiated) | 64.39%     |                     |         | 1.64                  | 0.75-3.56 | 0.215   |
| Grade III (poorly differentiated)    | 50.98%     |                     |         | 2.17                  | 1.02-4.65 | 0.045   |
| Grade IV (undifferentiated)          | 41.67%     |                     |         | 3.02                  | 1.32-6.92 | 0.009   |
| cell type not determined             | 49.30%     |                     |         | 1.92                  | 0.88-4.19 | 0.102   |
| <b>Histological type</b>             |            | 22.06               | 0.0012  |                       |           |         |
| Adenocarcinoma, NOS                  | 56.15%     |                     |         | Reference             |           |         |

|                                            |         |        |        |           |           |        |
|--------------------------------------------|---------|--------|--------|-----------|-----------|--------|
| Adenocarcinoma, intestinal type            | 61.47%  |        |        | 1.06      | 0.80-1.40 | 0.686  |
| Carcinoma, diffuse type                    | 50.27%  |        |        | 1.19      | 0.97-1.46 | 0.097  |
| Tubular adenocarcinoma                     | 57.14%  |        |        | 2.77      | 1.02-7.50 | 0.045  |
| Papillary adenocarcinoma,<br>NOS           | 100.00% |        |        | 0.87      | 0.28-2.72 | 0.809  |
| Mucinous adenocarcinoma                    | 59.73%  |        |        | 1.06      | 0.66-1.71 | 0.818  |
| Signet ring cell carcinoma                 | 48.68%  |        |        | 1.2       | 1.05-1.37 | 0.008  |
| <b>Stage<sup>a</sup></b>                   |         | 275.17 | <0.001 |           |           |        |
| I                                          | 78.86%  |        |        | Reference |           |        |
| II                                         | 54.32%  |        |        | 2.43      | 1.97-2.99 | <0.001 |
| III                                        | 35.18%  |        |        | 3.68      | 2.92-4.63 | <0.001 |
| <b>Surgery</b>                             |         | 400.13 | <0.001 |           |           |        |
| No surgery                                 | 17.49%  |        |        | Reference |           |        |
| Non-Total or Non-near-total<br>gastrectomy | 61.16%  |        |        | 0.32      | 0.25-0.42 | <0.001 |
| Total or near total gastrectomy            | 48.54%  |        |        | 0.42      | 0.32-0.56 | <0.001 |
| <b>Radiation</b>                           |         | 6.39   | 0.0409 |           |           |        |
| No radiotherapy                            | 51.29%  |        |        | Reference |           |        |
| Radiotherapy                               | 54.86%  |        |        | 0.67      | 0.59-0.76 | <0.001 |
| Radiotherapy unknown                       | 51.43%  |        |        | 0.78      | 0.51-1.19 | 0.241  |

Abbreviation: NOS= no other specific; SEER=Surveillance, Epidemiology and End Results;

<sup>a</sup>Being restaged according to the criteria of AJCC Cancer Staging Manual (7th edition, 2010)
